# Supplementary material for: Comparative analysis of SEC61A1 mutant R236C in two patient-derived cellular platforms
Source: PubMed Central journal article supplement (PMC11045796; doi:10.1038/s41598-024-59033-3), 2024-04-25
Supplement: 41598_2024_59033_MOESM1_ESM.pdf [file 41598_2024_59033_MOESM1_ESM.pdf]

## Supplementary Data

### Comparative analysis of SEC61A1 mutant R236C in two patient-derived cellular platforms

Matthias Weiland, Vanessa Sandfort, Oksana Nadzemova, Robert Schierwagen, Jonel Trebicka, Bernhard Schlevogt<sup>1</sup>, Iyad Kabar, Hartmut Schmidt<sup>2</sup>, and Andree Zibert<sup>#</sup>  
Medizinische Klinik B, Universitätsklinikum Münster, Münster, Germany

<sup>1</sup>Department of Gastroenterology, Medical Center Osnabrück, Osnabrück, Germany

<sup>2</sup>Klinik für Gastroenterologie und Hepatologie, Uniklinik Essen, Essen, Germany

<sup>1</sup>Correspondence to: Medizinische Klinik B (Gastroenterologie, Hepatologie, Endokrinologie, Klinische Infektiologie), Universitätsklinikum Münster, Albert-Schweitzer-Campus 1, Gebäude A14, D-48149 Münster, Germany.

Email: andree.zibert@ukmuenster.de

Telephone: +49-251- 83-57935

Fax: +49-251 83-57771

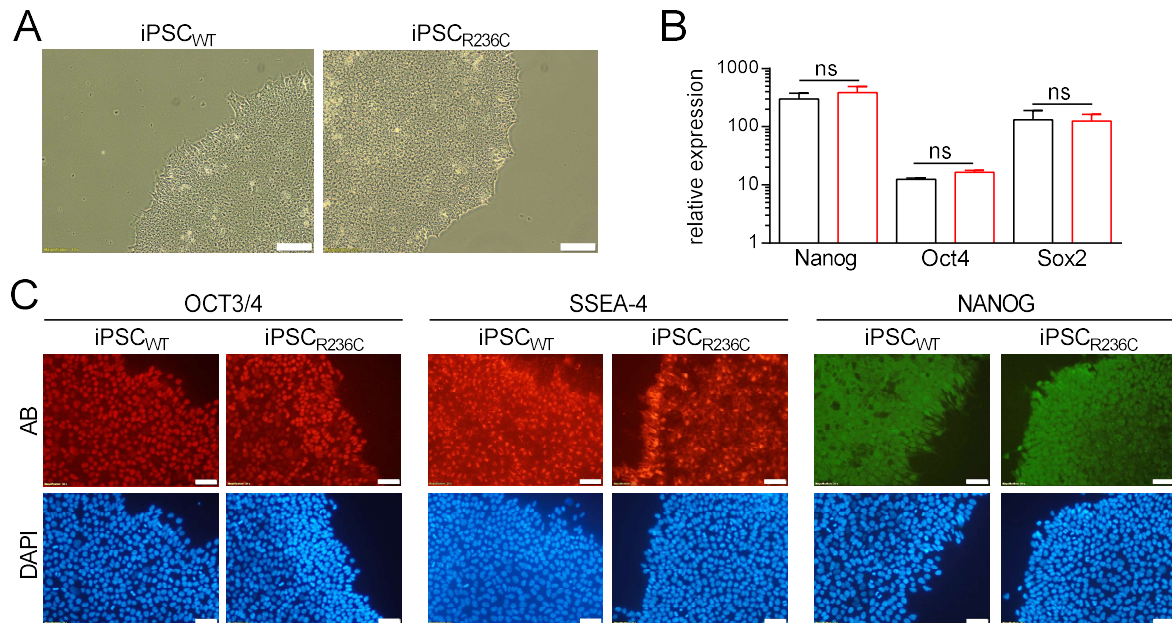

### Supplementary Figure S1.

**iPSC derived from patient encoding R236C showed typical morphology and stem cell marker expression** (A) Typical bright field image. One of four experiments is shown. Magnification 10x. Scale bars, 100  $\mu$ m. (B) Expression of stem cell marker genes derived from wildtype (black) and R236C cells (red). Mean $\pm$ SE of relative expression to GAPDH is shown (n=4). (C) Immunofluorescence staining of cells against stem cell markers. DAPI was used for nuclear counterstaining. One of four experiments is shown. Magnification 20x. Scale bars, 50  $\mu$ m. Mann-Whitney U test was used to test for statistical significance. ns, not significant p>0.05.

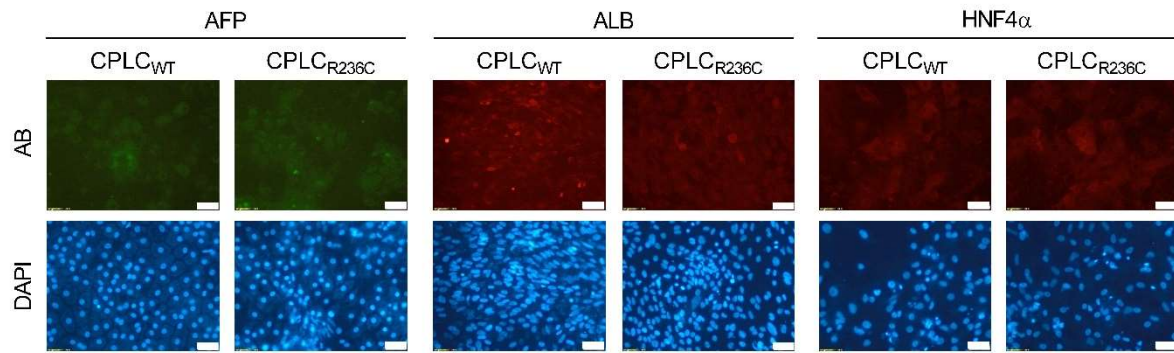

**Supplementary Figure S2.**

**Immunofluorescence of CPLCs showed expression of hepatocyte markers AFP, ALB and HNF4 $\alpha$ .** DAPI was used for nuclear counterstaining. One of four experiments is shown. Magnification 20x. Scale bars, 50  $\mu$ m.

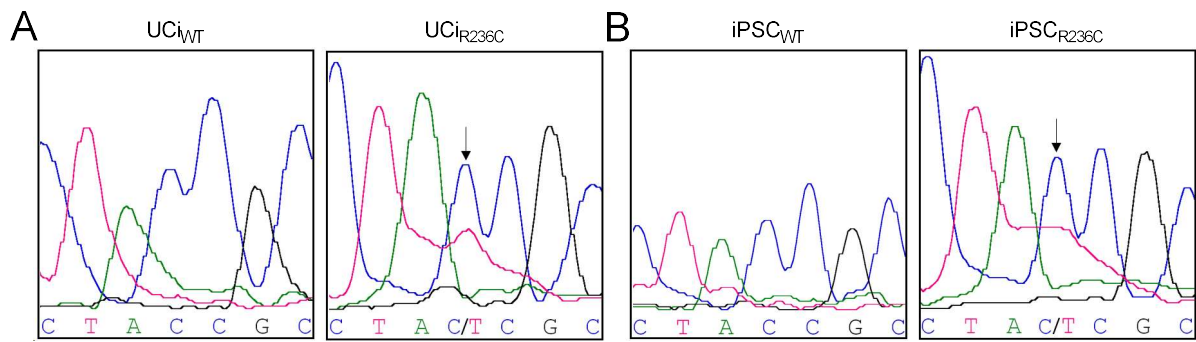

**Supplementary Figure S3.**

**Genotype c.706C>T (R236C) was maintained following retroviral immortalization (A) and reprogramming to iPSCs (B).** Chromatograms were established following sequence analyses of the *SEC61A1* gene. Heterozygotes at position 236 are indicated by arrow.

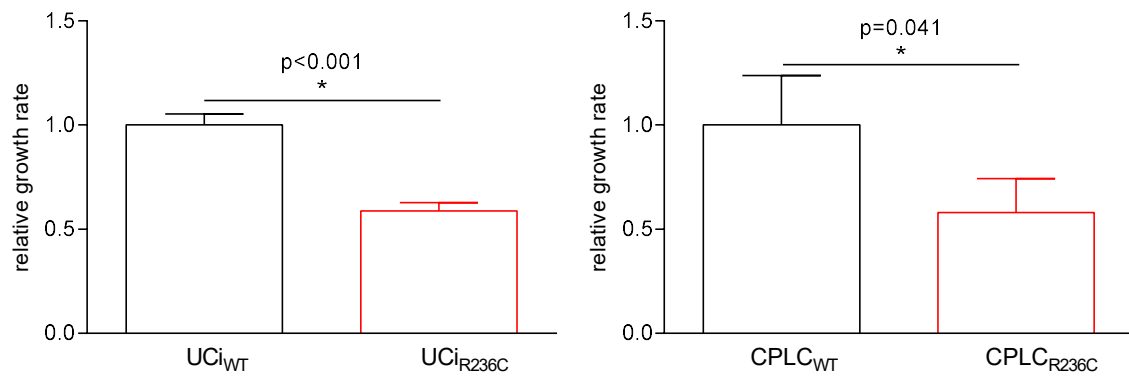

#### Supplementary Figure S4.

**Cells expressing R236C show reduced growth rate.** Cells were seeded at identical number at day 1. UCi growth rate was determined at day 3 after seeding (n=21). CPLC growth rate was determined at the end of differentiation at day 14 (n=6). The growth rate relative to WT is shown. Mann-Whitney U test was used to test for statistical significance. ns, not significant p>0.05.

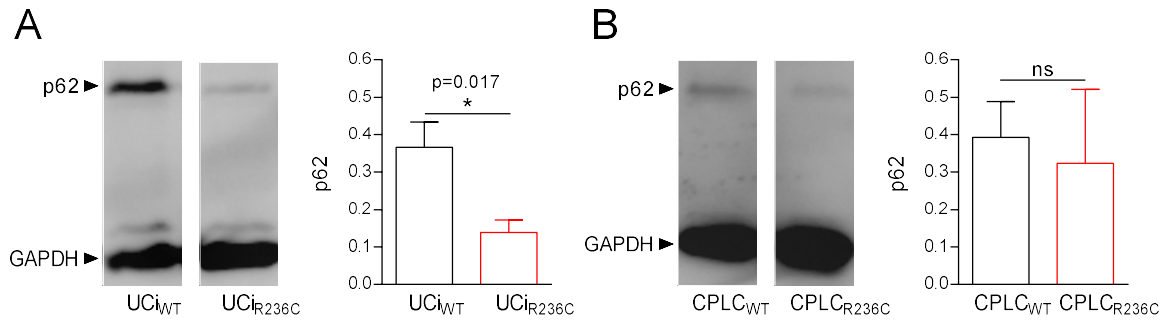

**Supplementary Figure S5.**

**Western blot analysis of p62/SQSTM1.**

A) UCI and (B) CPLC were subjected to Western blot analysis using autophagy-related marker p62/SQSTM1. One typical example is shown. Bar graphs depict relative expression in UCI (n=12) and CLPC (n=4) following densitometry analyses. GAPDH served for normalization. Mann-Whitney U test was used to test for statistical significance. ns, not significant p>0.05.

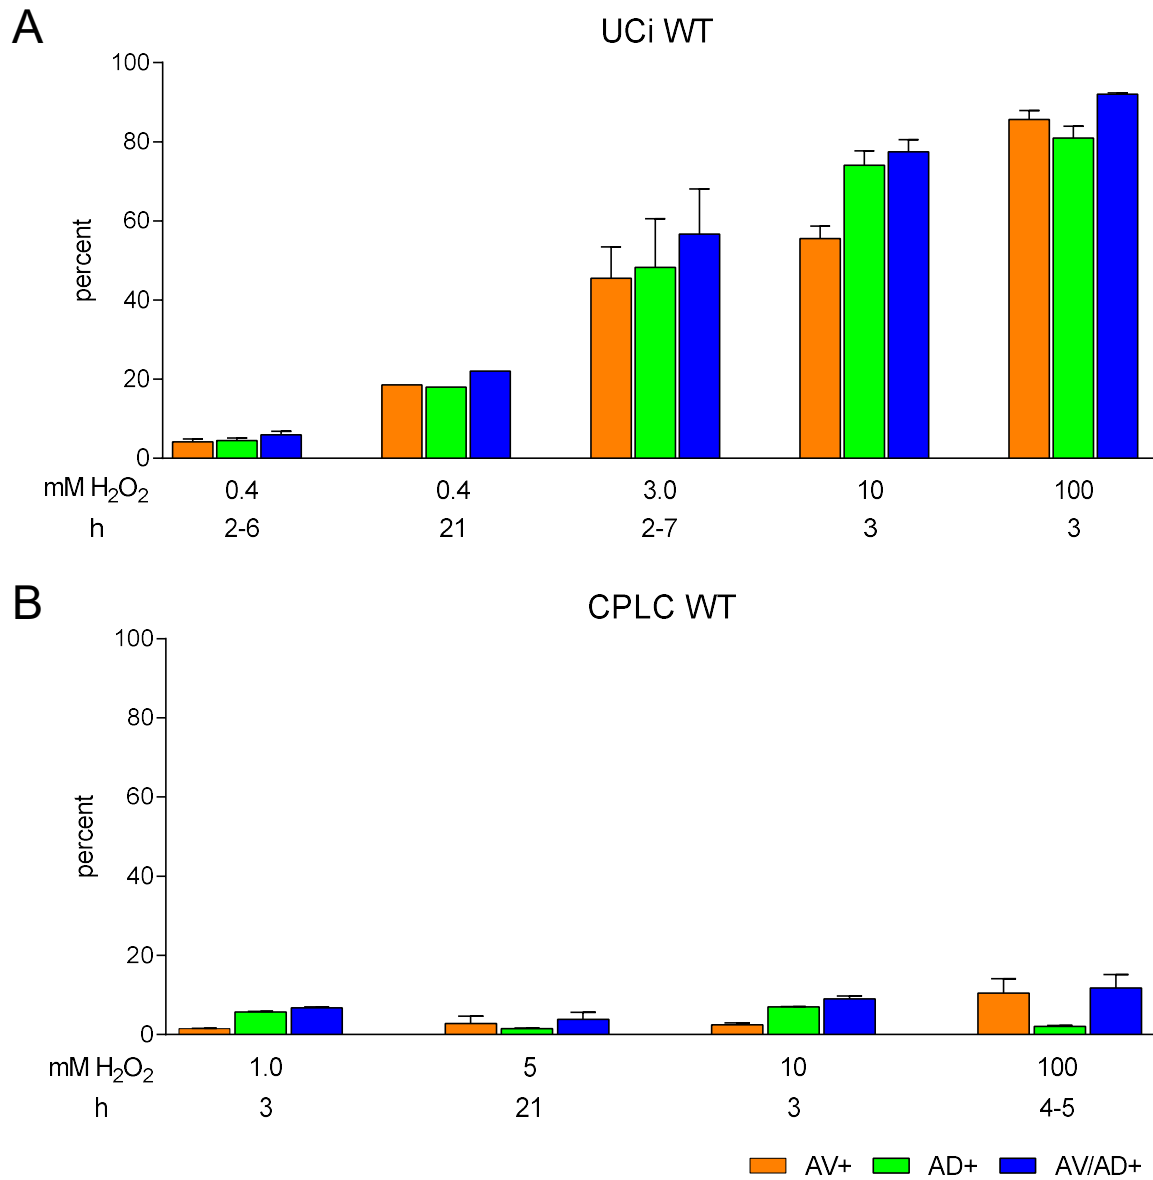

**Supplementary Figure S6.**

**CPLC are resistant to oxidative stress.** (A) Flow cytometry analysis of UCi and CLPC (B) following staining with Annexin V (AV) and 7AAD (AD). Wildtype cells were exposed to H<sub>2</sub>O<sub>2</sub> for indicated time.

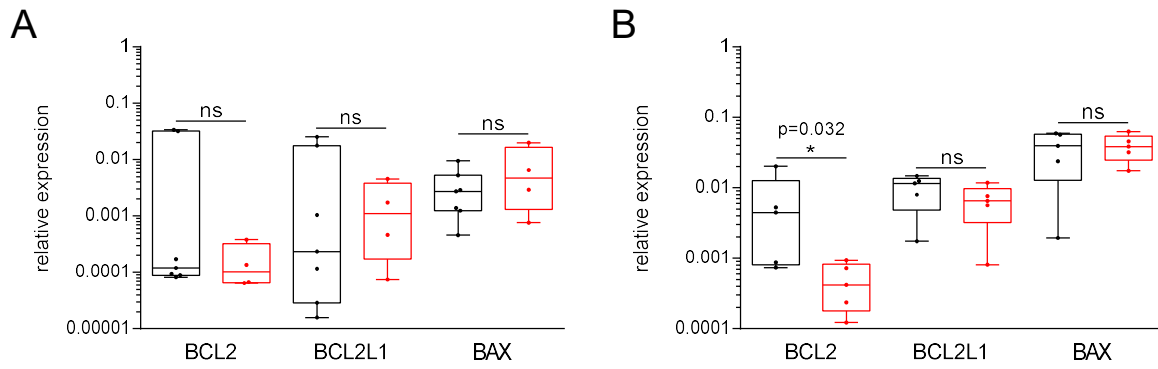

**Supplementary Figure S7.**

**qRT-PCR analysis of apoptosis-related genes.** Relative expression was determined in (A) UCi and (B) and CPLC. Box plots depicting expression in wildtype (black; n=7) and R236C cells (red; n=4) are shown. RT-qPCR data were normalized to GAPDH. Mann-Whitney U test was used to test for statistical significance. ns, not significant  $p > 0.05$ .



**Supplementary table S1: Primers**

| <b>Name</b>   | <b>Gene</b>                                                     | <b>Sequence (left/right)</b>                      | <b>origin</b>  |
|---------------|-----------------------------------------------------------------|---------------------------------------------------|----------------|
| <i>AFP</i>    | Alpha fetoprotein                                               | CAGGAAGTCTGCTTTGCTGAAG/<br>TCACACCGAATGAAAGACTCG  | NM_001134.3    |
| <i>ALB</i>    | Albumin                                                         | AGAAGTGCTGCAAGGCTGAC/<br>CCTAAGGCAGCTTGACTTGC     | NM_000477      |
| <i>ATP7B</i>  | ATPase, Cu <sup>++</sup> transporting,<br>beta polypeptide      | TCCTCTGTGTCTGTGGTGCTC/<br>ATGCGCCTGTGCCTCATA      | NM_000053      |
| <i>BAX</i>    | BCL2 Associated X                                               | GCCCTTTTCTACTTTGCCAGC/<br>TCAGCCCATCTTCTTCCAGAT   | NM_001291428.2 |
| <i>BCL2</i>   | BCL2 Apoptosis Regulator                                        | GGCCTTCTTTGAGTTCGGTGG/<br>GATAGGCACCCAGGGTGATGC   | NM_000633.3    |
| <i>BCL2L1</i> | BCL2 Like 1                                                     | TAAGGCGGATTTGAATCTC/<br>ATAATAGGGATGGGCTCAAC      | NM_138578.3    |
| <i>CFTR</i>   | CF transmembrane<br>conductance regulator                       | GAAAGTTGCAGATGAGGTTGGGC/<br>TGCTTGTGGCCATGGCTTAGG | NM_000492.4    |
| <i>CK19</i>   | Keratin 19                                                      | AGGAGATTGCCACCTACCG/<br>AGAGGACCTTGAGGCAGAC       | NM_002276      |
| <i>CK7</i>    | Keratin 7                                                       | TGGGAGCCGTGAATATCTCTG/<br>GCACTGCTGGAGAAGCTCAG    | NM_005556      |
| <i>CLDN1</i>  | Claudin 1                                                       | CCCAGTCAATGCCAGGTACG/<br>AAGTAGGGCACCTCCAGAAG     | NM_021101      |
| <i>FN1</i>    | Fibronectin 1                                                   | CTGGCCAGTCTACAACCAG/<br>TCGGGAATCTTCTCTGTCAGC     | NM_001306129   |
| <i>GAPDH</i>  | Glyceraldehyde-3-<br>phosphate oxygenase                        | CCCCTCCTCCACCTTTGAC/<br>CCACCACCCTGTTGCTGTAG      | NM_002046      |
| <i>L1CAM</i>  | L1 cell adhesion molecule                                       | AGGGCGGCAAATACTCAGTG/<br>CGCCGAAGGTCTCATCTTTC     | NM_000425      |
| <i>NANOG</i>  | Nanog homeobox                                                  | AATGGTGTGACGCAGAAGG/<br>CTGGGGTAGGTAGGTGCTGA      | NM_024865      |
| <i>OCN</i>    | Nuclear receptor subfamily<br>1 group I member 3 ( <i>CAR</i> ) | GAAGCAAGTGAAGGGATCTGC/<br>CCAACCATCTTCTTGATGTGTG  | NM_001205254   |
| <i>OCT4</i>   | POU class 5 homeobox 1                                          | GAACCGAGTGAGAGGCAACC/<br>AACCACACTCGGACCACATC     | NM_002701      |
| <i>SNAI2</i>  | Snail family zinc finger 2                                      | ACCCTGGTTGCTTCAAGGAC/<br>GAATGGGTCTGCAGATGAGC     | NM_003068      |
| <i>SOX2</i>   | SRY (sex determining<br>region Y)-box 2                         | ATGGGTTCCGGTGGTCAAGTC/<br>CTGATCATGTCCCGGAGGTC    | NM_003106      |
| <i>SOX9</i>   | SRY (sex determining<br>region Y)-box 9                         | CCCAACGCCATCTTCAAGGC/<br>CCTGGGATTGCCCGAGTG       | NM_000346.4    |
| <i>TF</i>     | Transferrin                                                     | GATAAGGAAGCTTGCGTCCAC/<br>TTGCCCGAGCAGTCAGTTAC    | NM_001063      |
| <i>TTR</i>    | Transthyretin                                                   | GAAAGGCTGCTGATGACACC/<br>TCAGTTGTGAGCCCATGCAG     | NM_000371      |

**Supplementary table S2: Antibodies**

| <b>Antibody</b>                    | <b>Method*</b> | <b>Company</b>        | <b>Dilution</b> | <b>Catalog Number</b> |
|------------------------------------|----------------|-----------------------|-----------------|-----------------------|
| AFP                                | ICC            | Santa Cruz            | 1:100           | sc-8399               |
| ALB                                | ICC            | abcam                 | 1:100           | ab2406                |
| HNF4                               | ICC            | Santa Cruz            | 1:100           | sc-6556               |
| NANOG                              | ICC            | Stemcell Technologies | 1:100           | sc-33759              |
| OCT3/4-PE                          | ICC            | Stemcell Technologies | 1:100           | 60093PE               |
| SSEA-4-PE                          | ICC            | Stemcell Technologies | 1:100           | 60062PE               |
| Alexa Fluor 488                    | ICC            | Life Technologies     | 1:500           | A11001                |
| Alexa Fluor 488                    | ICC            | Invitrogen            | 1:500           | A11054                |
| Alexa Fluor 568                    | ICC            | Life Technologies     | 1:500           | A11057                |
| Alexa Fluor 594                    | ICC            | Life Technologies     | 1:500           | A11012                |
| LC3B                               | WB             | Cell Signaling        | 1:500           | 2775                  |
| GAPDH                              | WB             | Cell Signaling        | 1:7000          | 2118                  |
| p62/SQSTM1                         | WB             | Cell Signaling        | 1:500           | 5114                  |
| Anti-IgG                           | WB             | Cell Signaling        | 1:1000          | 7074                  |
| CD13-PC5                           | FC             | Beckman Coulter       | 1:100           | A07763                |
| CD29-FITC                          | FC             | Beckman Coulter       | 1:100           | IM0791U               |
| CD71-FICT                          | FC             | Beckman Coulter       | 1:100           | IM0483                |
| CD105-PE                           | FC             | Beckman Coulter       | 1:100           | A07414                |
| CD166-PE                           | FC             | Beckman Coulter       | 1:100           | A22361                |
| AFP-PE                             | FC             | Santa Cruz            | 1:100           | sc-8399 PE            |
| CK19-AF647                         | FC             | Santa Cruz            | 1:100           | sc-6278 AF647         |
| SOX9-FITC                          | FC             | Santa Cruz            | 1:100           | sc-166505 FITC        |
| FITC, PE, PC5<br>isotype control   | FC             | Beckman Coulter       | 1:100           | A22361                |
| Alexa Fluor 647<br>isotype control | FC             | Bio Legend            | 1:100           | 366913                |

\*ICC, immunocytochemistry; WB, Western blot; FC, flow cytometry
